# Supplementary material for: The Selenoprotein MsrB1 Instructs Dendritic Cells to Induce T-Helper 1 Immune Responses
Source: PubMed Central journal article supplement (PMC7589095; doi:10.3390/antiox9101021), 2020-10-20
Supplement: antioxidants-09-01021-s001.pdf [file antioxidants-09-01021-s001.pdf]

## Supplementary Figures and legends

**A**

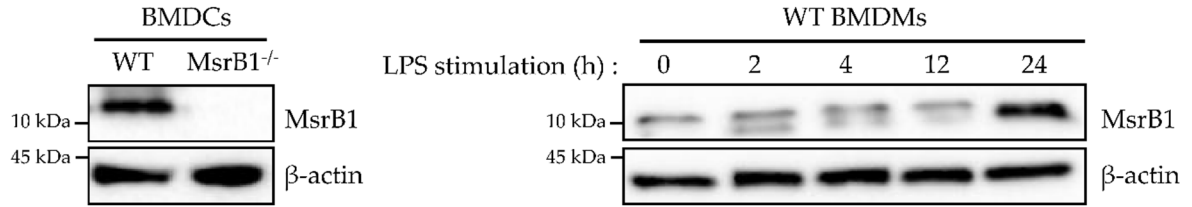

**B**

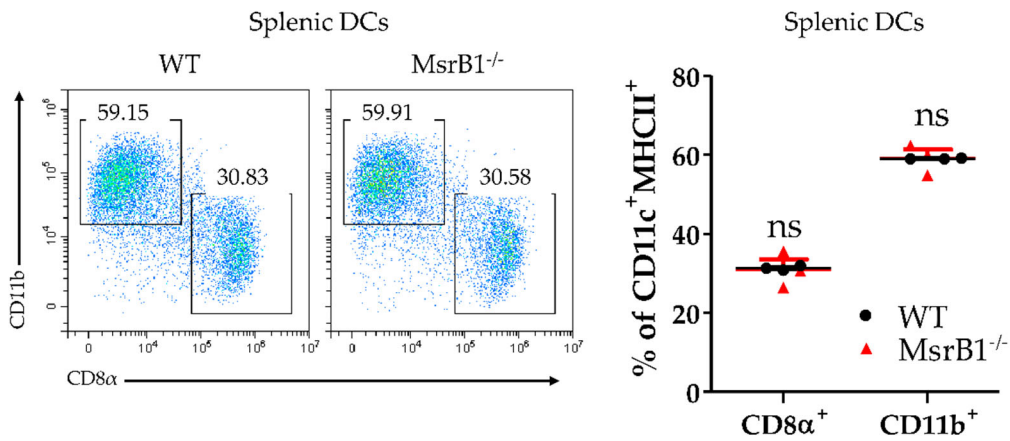

**Supplementary Figure 1. Bone marrow-derived DCs express MsrB1 and MsrB1 deficiency does not affect classical DC differentiation in the spleen.** (A) Bone marrow-derived DCs (BMDCs, left) and macrophages (BMDMs, right) were generated from WT and MsrB1<sup>-/-</sup> mice and then subjected on day 8 of culture to western blotting of MsrB1 expression. β-actin was used as housekeeping control. (B) The classical DCs in the spleen of WT and MsrB1<sup>-/-</sup> mice ( $n = 3$  per group) were analyzed by flow cytometry by gating on the CD11c<sup>high</sup>MHC II<sup>high</sup> cells in the live cells. Mean  $\pm$  SEM are shown. The data shown are representative of two independent experiments that had similar results. ns, not significant, as determined by unpaired  $t$ -test.

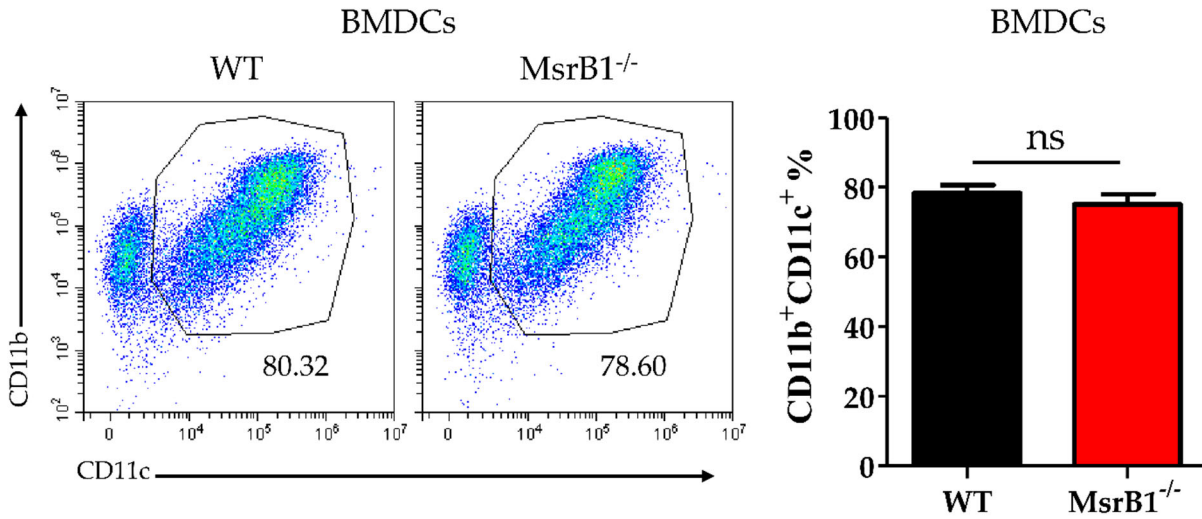

**Supplementary Figure 2. MsrB1 deficiency does not affect the GM-CSF-induced differentiation of BMDCs from bone-marrow progenitors.** BMDCs were generated from WT and MsrB1<sup>-/-</sup> mice ( $n = 3$  per group) with GM-CSF and then analyzed on day 8 of culture by flow cytometry with gating on the CD11c<sup>high</sup>CD11b<sup>high</sup> cells in the live cells. Mean  $\pm$  SEM are shown. The data shown are representative of four independent experiments that had similar results. ns, not significant, as determined by unpaired  $t$ -test.

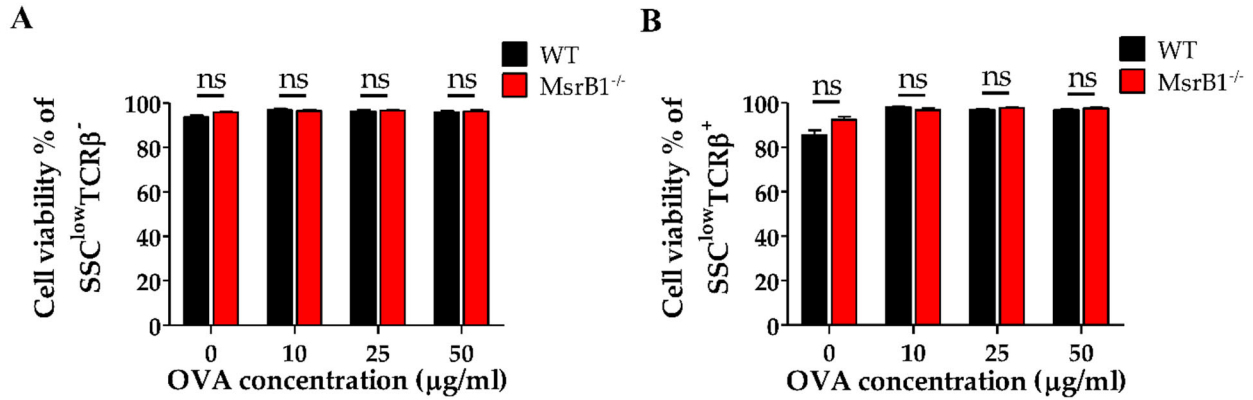

**Supplementary Figure 3. MsrB1 deficiency does not affect OVA-loaded BMDC or T-cell survival.** WT and MsrB1<sup>-/-</sup> BMDCs were loaded with 0, 10, 25, or 50 μg/ml OVA and co-cultured with naïve OT-II cells ( $n = 3$  per group). The co-cultures were subjected to flow cytometry to measure the frequency of propidium iodide (PI)-negative BMDCs (A) and OT-II cells (B). The BMDC populations were analyzed by gating on the SSC<sup>low</sup>TCRβ<sup>-</sup> in the live cells. The OT-II cell populations were analyzed by gating on the SSC<sup>low</sup>TCRβ<sup>+</sup> cells in the live cells. Mean ± SEM are shown. The data shown are representative of two independent experiments that had similar results. ns, not significant, as determined by unpaired *t*-test.

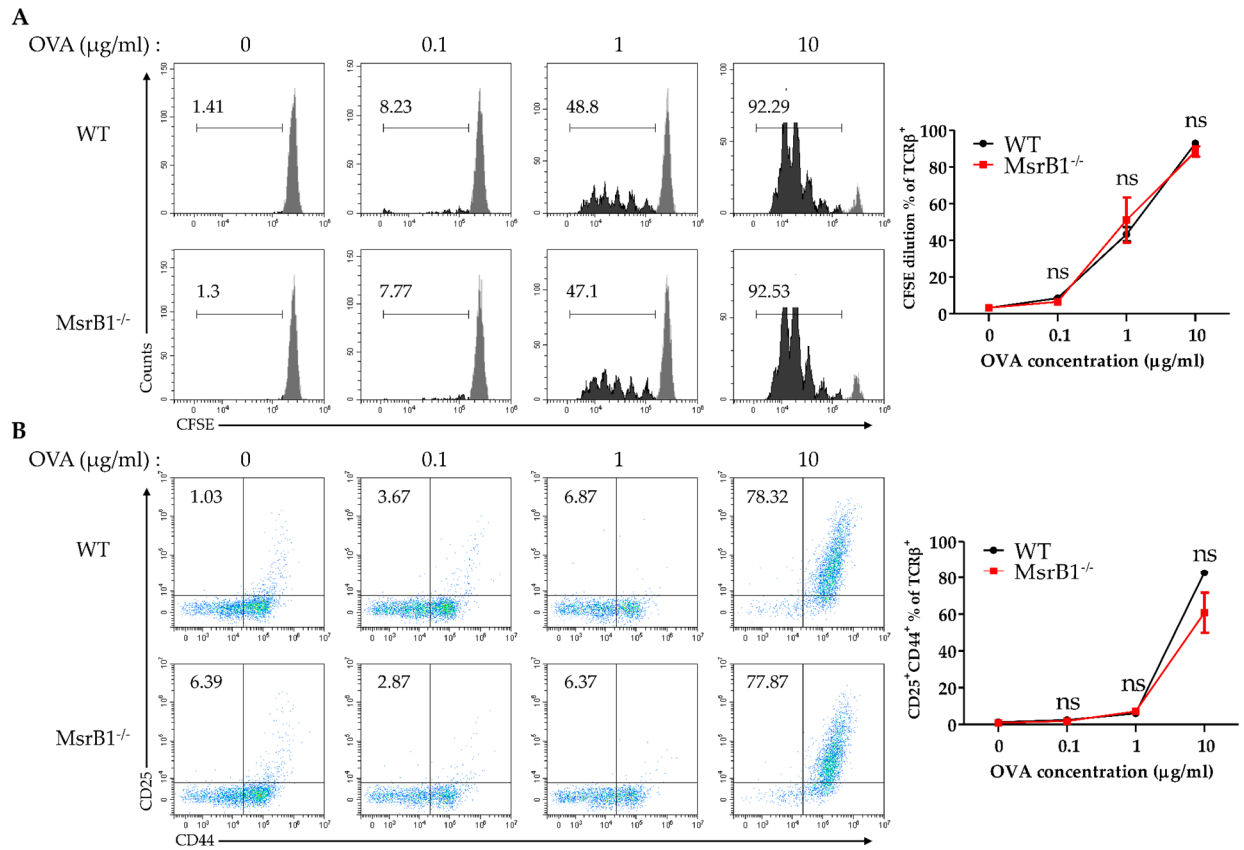

**Supplementary Figure 4. Msrb1<sup>-/-</sup> BMDCs present antigen normally to CD8<sup>+</sup> T cells.** Naïve OT-I cells, which are transgenic OVA<sub>257-264</sub>-specific MHC class I-restricted CD8 T cells, were stained with CFSE and co-cultured for 3 days with WT and Msrb1<sup>-/-</sup> BMDCs that had been loaded with 0, 0.1, 1, or 10  $\mu\text{g/ml}$  OVA ( $n = 3$  per group). CFSE dilution (A) and OT-I cell activation, as measured by CD25<sup>high</sup>CD44<sup>high</sup> cell frequencies (B) were measured by flow cytometry by gating on the SSC<sup>low</sup>TCR $\beta^+$  cells in the live cells. Mean  $\pm$  SEM are shown. The data shown are representative of two independent experiments that had similar results. ns, not significant, as determined by unpaired  $t$ -test.

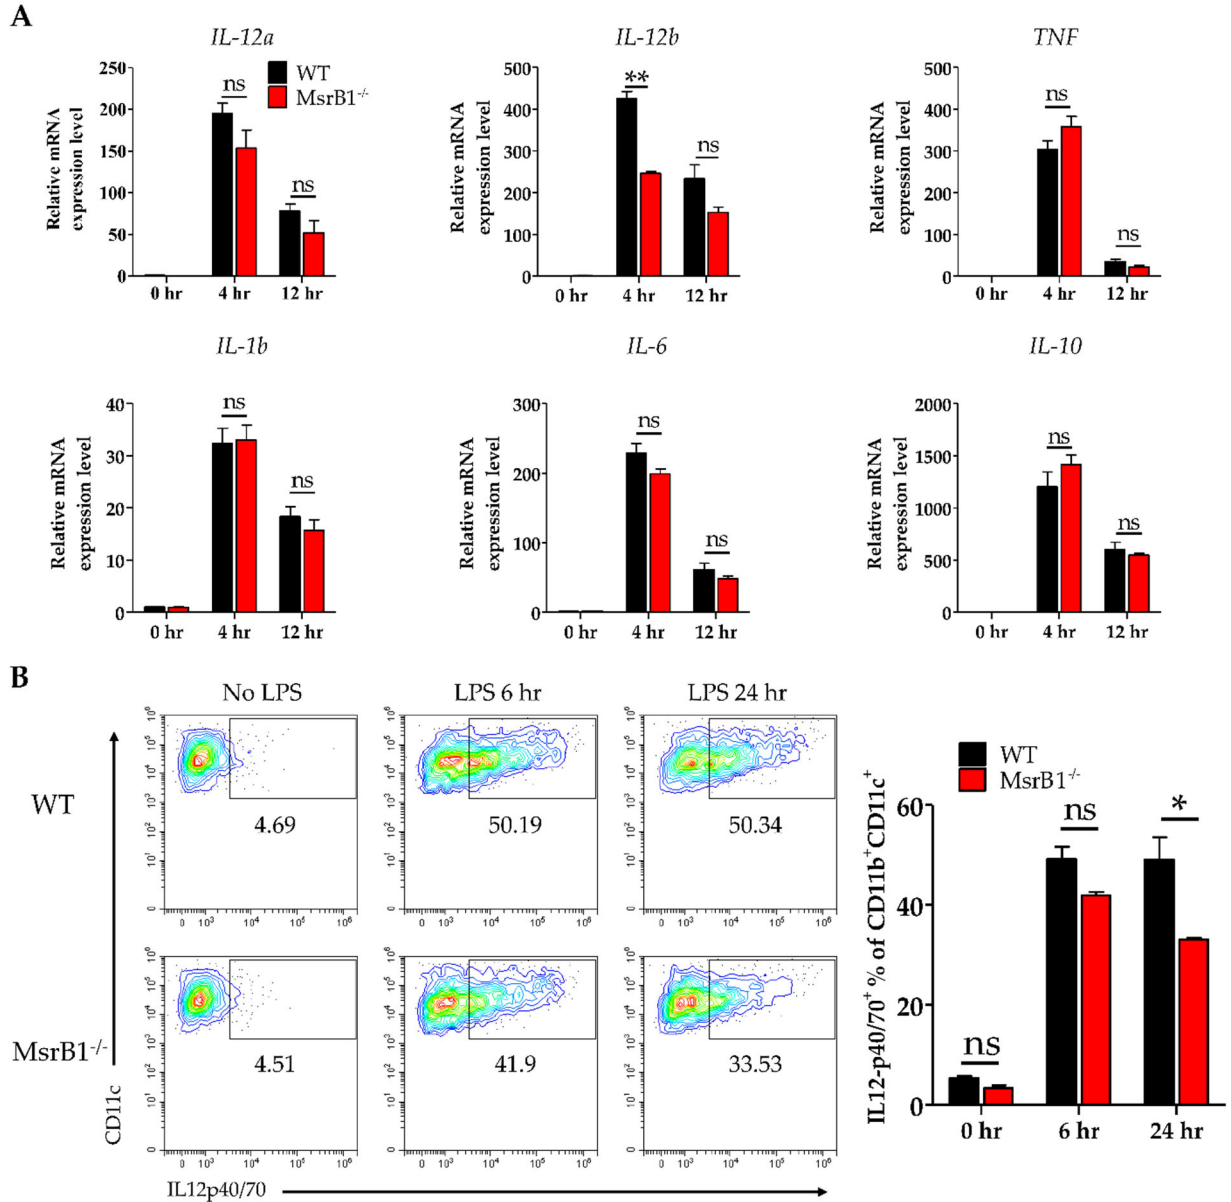

**Supplementary Figure 5. MsrB1-deficient BMDCs generated with IL-4 and GM-CSF showed decreased LPS-induced IL-12 production *in vitro*.** WT and MsrB1<sup>-/-</sup> BMDCs were generated with IL-4 and GM-CSF and treated with LPS for the indicated time ( $n = 3$  per group). (A) qRT-PCR was used to measure the BMDC transcript levels of *IL-12a*, *IL-12b*, *TNF*, *IL-1b*, *IL-6*, and *IL-10*. (B) Flow cytometry with gating on the CD11c<sup>high</sup>CD11b<sup>high</sup> cells in the live cells was used to measure the intracellular BMDM levels of IL-12p40/70 levels. Mean  $\pm$  SEM are shown. The data shown are representative of two independent experiments that had similar results. \*,  $P < 0.05$ ; ns, not significant, as determined by unpaired *t*-test.

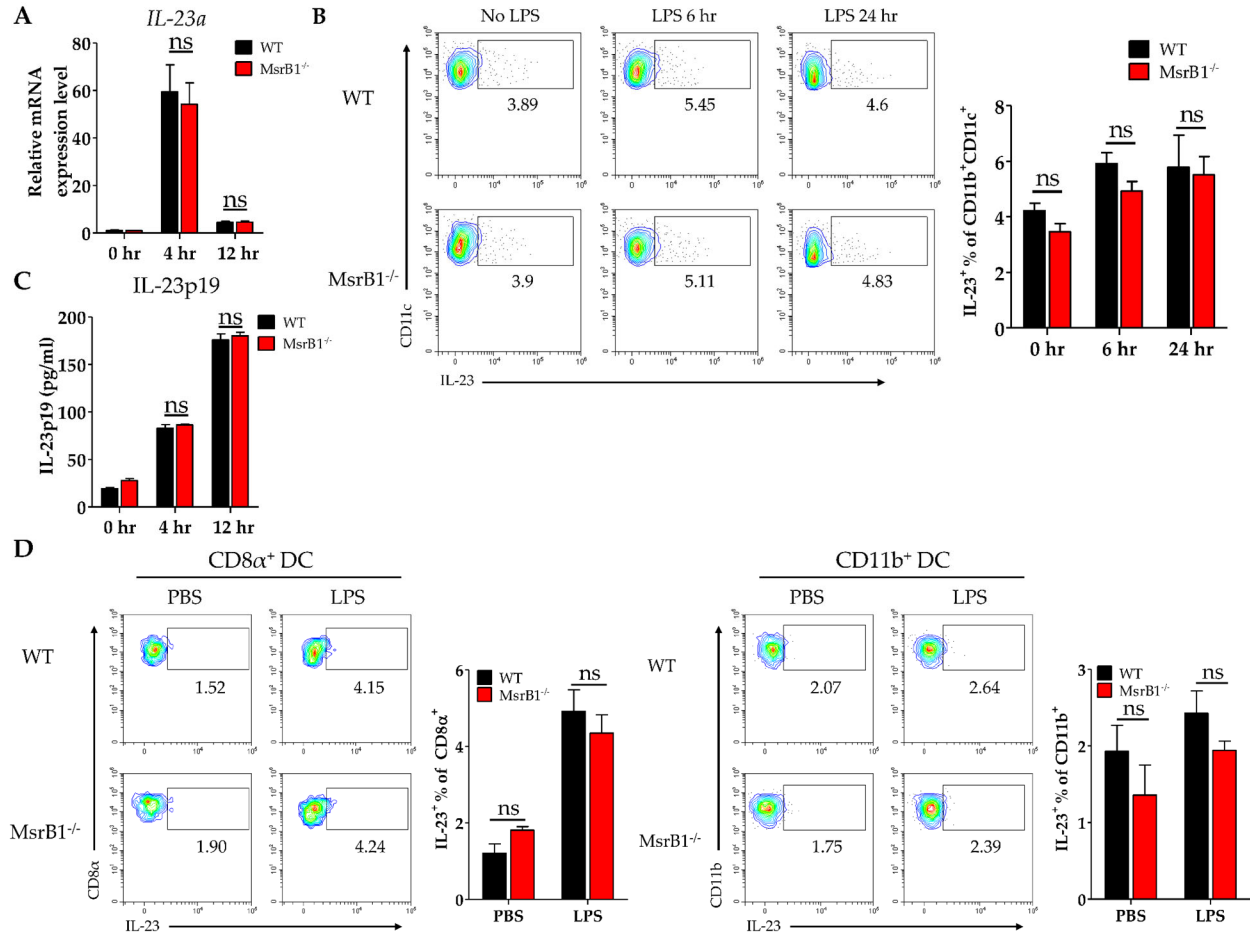

**Supplementary Figure 6. MsrB1-deficient BMDCs showed normal LPS-induced IL-23 production.** (A, B) WT and MsrB1<sup>-/-</sup> BMDCs were generated with GM-CSF and treated with LPS for the indicated time ( $n = 3$  per group). (A) qRT-PCR was used to measure the BMDC transcript levels of *IL-23a*. (B) Flow cytometry with gating on the CD11c<sup>high</sup>CD11b<sup>high</sup> cells in the live cells was used to measure the intracellular BMDM levels of IL-23 levels. (C) The levels of IL-23p19 in the culture media were measured by ELISA (D) Splenocytes isolated from WT and MsrB1<sup>-/-</sup> mice 3 hr after LPS injection were cultured in the presence of Brefeldin A for 4 hr. The CD8α<sup>+</sup> (left) and CD11b<sup>+</sup> (right) DCs of the WT and MsrB1<sup>-/-</sup> mice ( $n = 3$  per group) were analyzed by flow cytometry for their intracellular IL-23 levels. The classical DCs were analyzed by gating on the CD8α<sup>+</sup> or CD11b<sup>+</sup> cells in the live CD11c<sup>+</sup> MHC II<sup>+</sup> cells. Mean ± SEM are shown. The data shown are representative of two independent experiments that had similar results. ns, not significant, as determined by unpaired *t*-test.

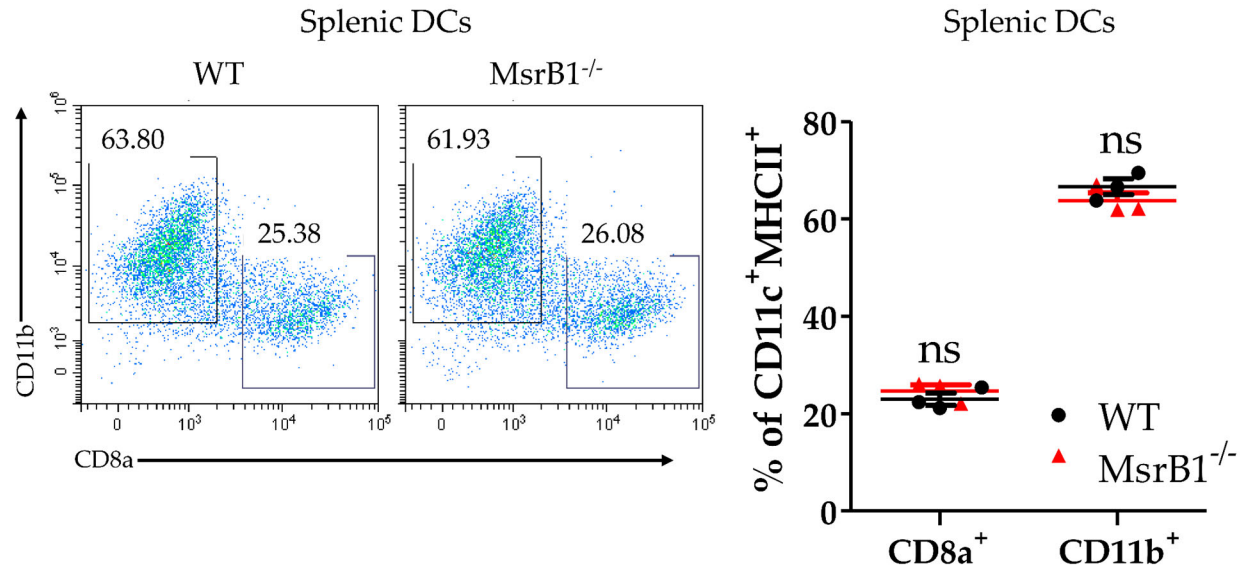

**Supplementary Figure 7. MsrB1 deficiency does not change the effect of LPS challenge on classical DC subsets in the spleen.** WT and MsrB1<sup>-/-</sup> mice were injected intraperitoneally with LPS. Three hours later, the splenocytes were harvested and the CD8α<sup>+</sup> and CD11b<sup>+</sup> cells were counted by flow cytometry using gating on the CD11c<sup>+</sup>MHC II<sup>+</sup> cells in the live cells. Mean ± SEM are shown. ns, not significant, as determined by unpaired *t*-test. The data shown are representative of two experiments that had similar results.
